# Supplementary material for: Acclimation temperature affects thermal reaction norms for energy reserves in Drosophila
Source: PubMed Central journal article supplement (PMC7729904; doi:10.1038/s41598-020-78726-z), 2020-12-10
Supplement: 41598_2020_78726_MOESM1_ESM.pdf [file 41598_2020_78726_MOESM1_ESM.pdf]

## *Supplementary Information*

# **Acclimation temperature affects thermal reaction norms for energy reserves in *Drosophila***

**Peter Klepsatel, Thirnahalli Nagaraj Girish and Martina Gálíková**

### **Supplementary Figures and Tables**

**Supplementary Figure S1. The effect of acclimation temperature on thermal reaction norms for fat stores.** The fat content normalised to protein content ( $\mu\text{g}$  glycerides per mg protein) in flies from India (a) and Slovakia (b). Data points are mean values  $\pm$  s.e.m.. Lines represent a quadratic fit to data with the 95% confidence band. For statistical analyses, see Supplementary Table S3-S5.

**Supplementary Figure S2. The maximum values (i.e. values at the optimal temperature) for fat reserves estimated based on (a) the absolute fat content ( $\mu\text{g}$  glycerides per fly), and (b) the fat content normalised to protein content ( $\mu\text{g}$  glycerides per mg protein).** Error bars represent 95% confidence intervals. Values with different letters are significantly different from each other ( $\alpha = 0.05$ ).

**Supplementary Figure S3. The effect of acclimation temperature on thermal reaction norms for the relative changes in the the fat content normalised to protein content (calculated as a ratio between the end values and the mean of initial values) in flies from India (a) and Slovakia (b).** Data points are mean values  $\pm$  s.e.m.. Lines represent a quadratic fit to data with the 95% confidence band. For statistical analyses, see Supplementary Table S3-S5.

**Supplementary Figure S4. The optimal temperatures for fat reserves estimated based on (a) the fat content normalised to protein content ( $\mu\text{g}$  glycerides per mg protein), and (b) the relative changes in the fat content normalised to protein content.** Error bars represent 95% confidence intervals. Values with different letters are significantly different from each other ( $\alpha = 0.05$ ).

**Supplementary Figure S5. The thermal performance breadth at 75% of maximum for fat reserves estimated based on (a) the absolute fat content ( $\mu\text{g}$  glycerides per fly), (b) the relative changes in the absolute fat content, (c) the fat content normalised to protein content ( $\mu\text{g}$  glycerides per mg protein), and (d) the relative changes in the fat content normalised to protein content.** Error bars represent 95% confidence intervals. Values with different letters are significantly different from each other ( $\alpha = 0.05$ ).

**Supplementary Figure S6. The estimated coefficients of fitted quadratic functions ( $y = ax^2 + bx + c$ , where  $a$  is quadratic coefficient,  $b$  is slope,  $c$  is intercept,  $x$  is temperature, and  $y$  is the value of energy stores) for fat reserves estimated based on (a, b, c) the absolute fat content ( $\mu\text{g}$  glycerides per fly), and (d, e, f) the relative changes in the absolute fat content.** (a, d) Quadratic coefficient, (b, e) slope, (c, f) intercept. Error bars represent 95% confidence intervals. Values with different letters are significantly different from each other ( $\alpha = 0.05$ ).

**Supplementary Figure S7. The estimated coefficients of fitted quadratic functions ( $y = ax^2 + bx + c$ , where  $a$  is quadratic coefficient,  $b$  is slope,  $c$  is intercept,  $x$  is temperature, and  $y$  is the value of energy stores) for fat reserves estimated based on (a, b, c) the fat content**

**normalised to protein content ( $\mu\text{g}$  glycerides per mg protein), and (d, e, f) the relative changes in the fat content normalised to protein content.** (a, d) Quadratic coefficient, (b, e) slope, (c, f) intercept. Error bars represent 95% confidence intervals. Values with different letters are significantly different from each other ( $\alpha = 0.05$ ).

**Supplementary Figure S8. The effect of acclimation temperature on thermal reaction norms for glycogen reserves.** The glycogen content normalised to protein content ( $\mu\text{g}$  glycogen per mg protein) in flies from India (a) and Slovakia (b). Data points are mean values  $\pm$  s.e.m.. Lines represent a quadratic fit to data with the 95% confidence band. For statistical analyses, see Supplementary Table S8-S10.

**Supplementary Figure S9. The maximum values (i.e. values at the optimal temperature) for glycogen stores estimated based on (a) the absolute glycogen content ( $\mu\text{g}$  glycogen per fly), and (b) the glycogen content normalised to protein content ( $\mu\text{g}$  glycogen per mg protein).** Error bars represent 95% confidence intervals. Values with different letters are significantly different from each other ( $\alpha = 0.05$ ).

**Supplementary Figure S10. The effect of acclimation temperature on thermal reaction norms for the relative changes in the the glycogen content normalised to protein content (calculated as a ratio between the end values and the mean of initial values) in flies from India (a) and Slovakia (b).** Data points are mean values  $\pm$  s.e.m.. Lines represent a quadratic fit to data with the 95% confidence band. For statistical analyses, see Supplementary Table S8-S10.

**Supplementary Figure S11. The optimal temperatures for glycogen stores estimated based on (a) the glycogen content normalised to protein content ( $\mu\text{g}$  glycogen per mg protein), and (b) the relative changes in the glycogen content normalised to protein content.** Error bars represent 95% confidence intervals. Values with different letters are significantly different from each other ( $\alpha = 0.05$ ).

**Supplementary Figure S12. The thermal performance breadth at 75% of maximum for glycogen stores estimated based on (a) the absolute glycogen content ( $\mu\text{g}$  glycogen per fly), (b) the relative changes in the absolute glycogen content, (c) the glycogen content normalised to protein content ( $\mu\text{g}$  glycogen per mg protein), and (d) the relative changes in the glycogen content normalised to protein content.** Error bars represent 95% confidence intervals. Values with different letters are significantly different from each other ( $\alpha = 0.05$ ).

**Supplementary Figure S13. The estimated coefficients of fitted quadratic functions ( $y = ax^2 + bx + c$ , where  $a$  is quadratic coefficient,  $b$  is slope,  $c$  is intercept,  $x$  is temperature, and  $y$  is the value of energy stores) for glycogen stores estimated based on (a, b, c) the absolute glycogen content ( $\mu\text{g}$  glycogen per fly), and (d, e, f) the relative changes in the absolute glycogen content.** (a, d) Quadratic coefficient, (b, e) slope, (c, f) intercept. Error bars represent 95% confidence intervals. Values with different letters are significantly different from each other ( $\alpha = 0.05$ ).

**Supplementary Figure S14. The estimated coefficients of fitted quadratic functions ( $y = ax^2 + bx + c$ , where  $a$  is quadratic coefficient,  $b$  is slope,  $c$  is intercept,  $x$  is temperature, and  $y$  is the value of energy stores) for glycogen stores estimated based on (a, b, c) the glycogen content normalised to protein content ( $\mu\text{g}$  glycogen per mg protein), and (d, e, f) the**

**relative changes in the glycogen content normalised to protein content.** (a, d) Quadratic coefficient, (b, e) slope, (c, f) intercept. Error bars represent 95% confidence intervals. Values with different letters are significantly different from each other ( $\alpha = 0.05$ ).

Supplementary Figure S1.

(a)

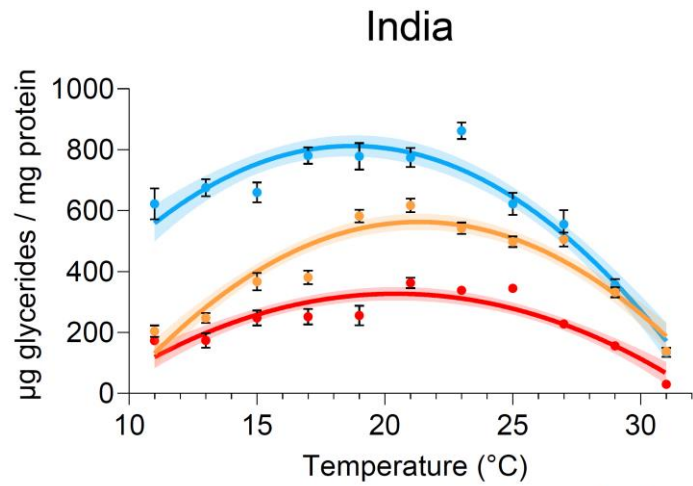

(b)

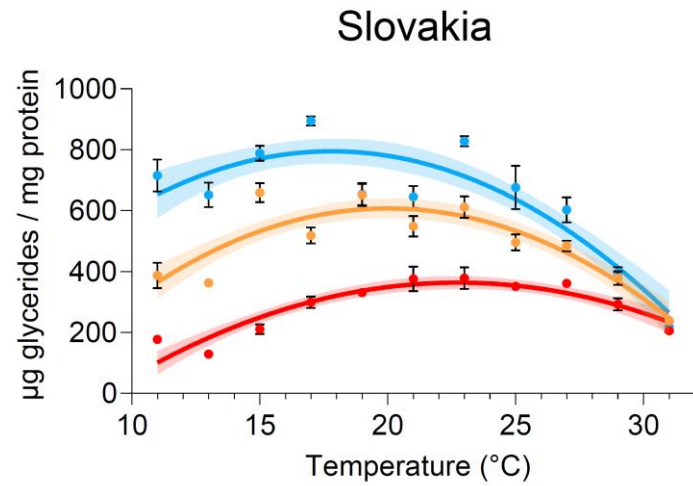

Acclimation temperature

● 19°C ● 25°C ● 29°C

Supplementary Figure S2.

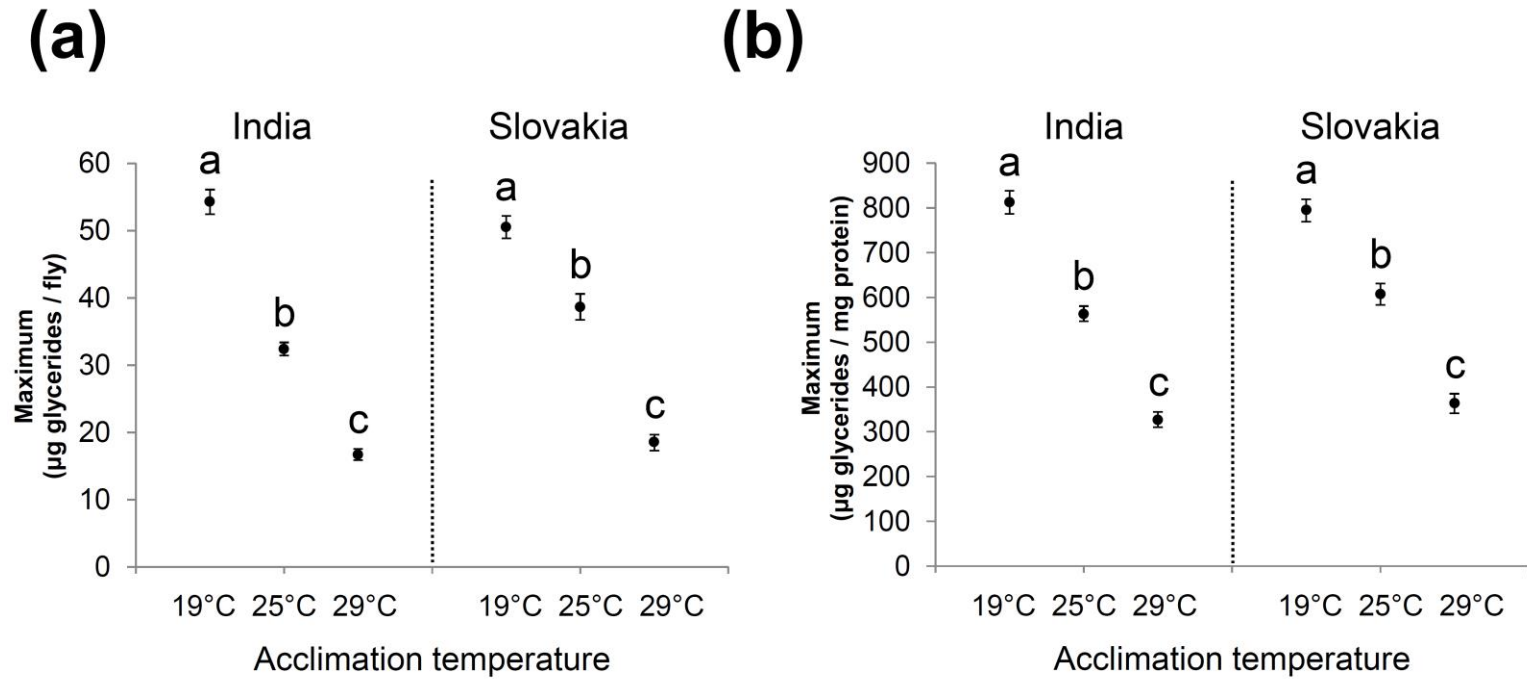

Supplementary Figure S3.

(a)

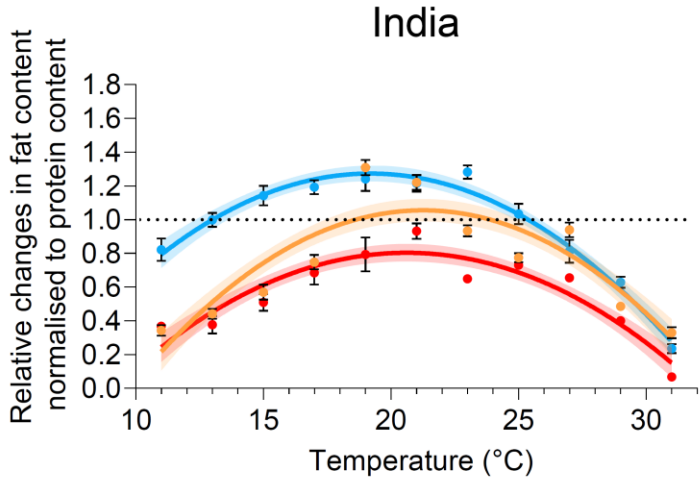

(b)

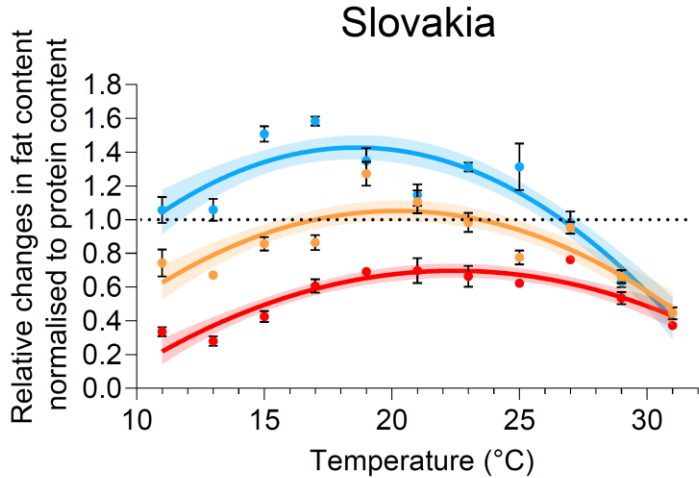



Supplementary Figure S4.

(a)

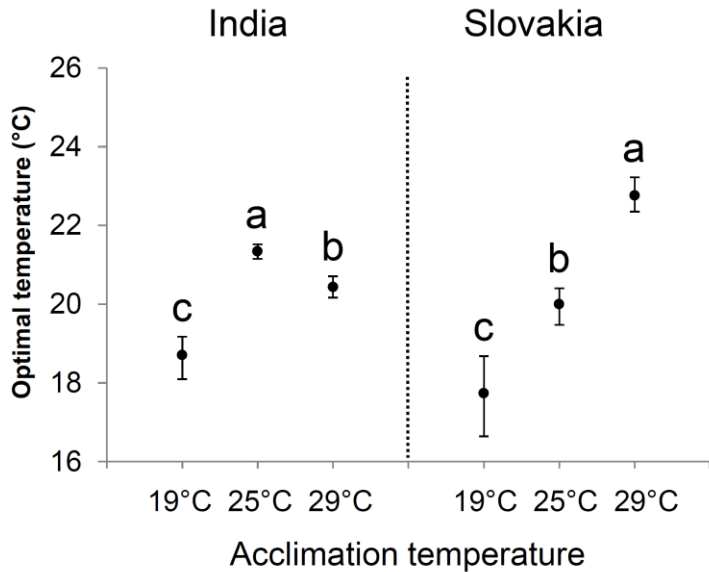

(b)

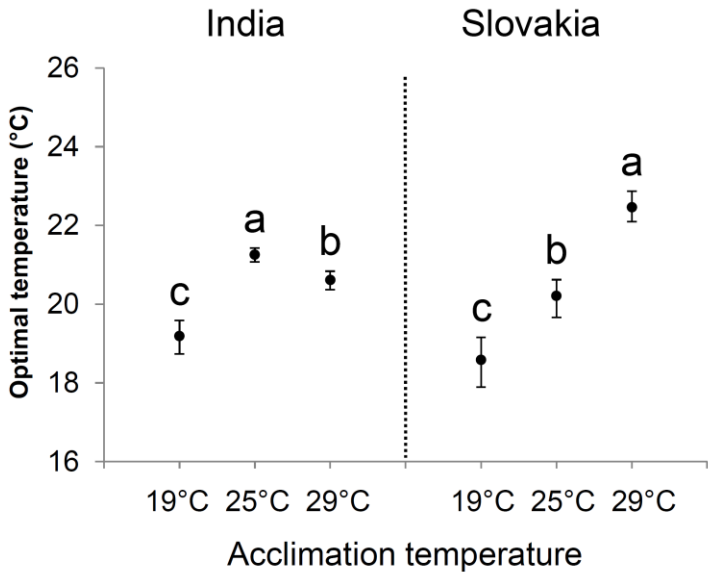

Supplementary Figure S5.

(a)

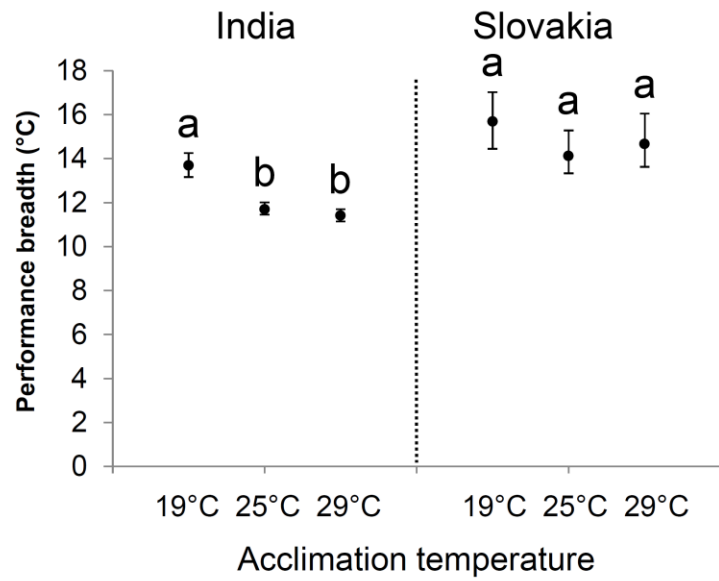

(b)

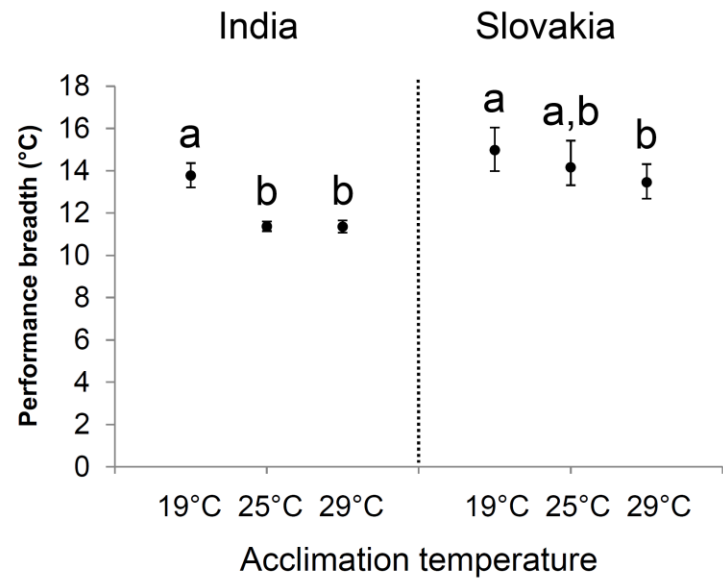

(c)

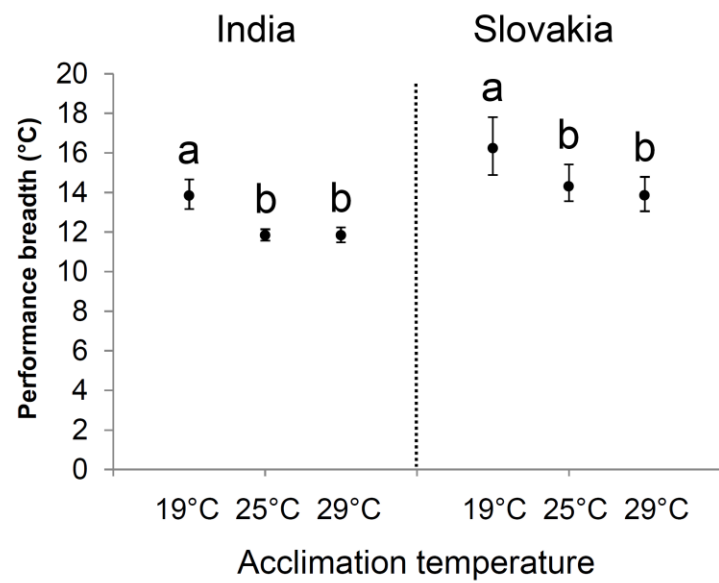

(d)

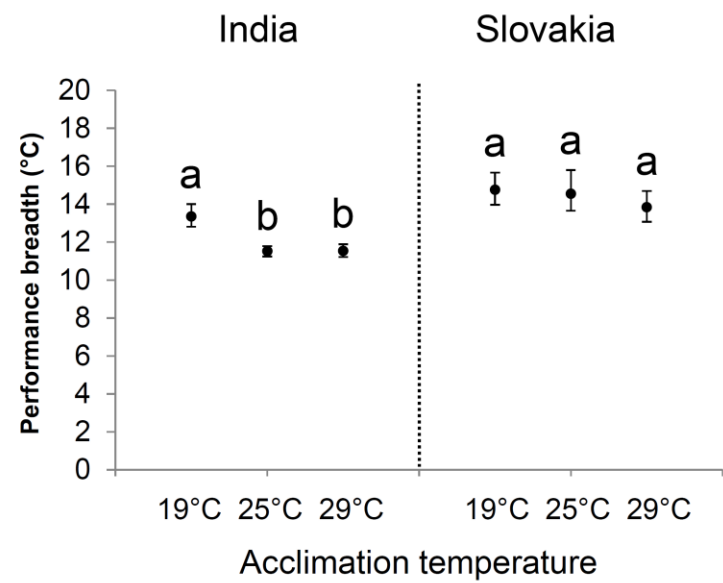

**Supplementary Figure S6.**

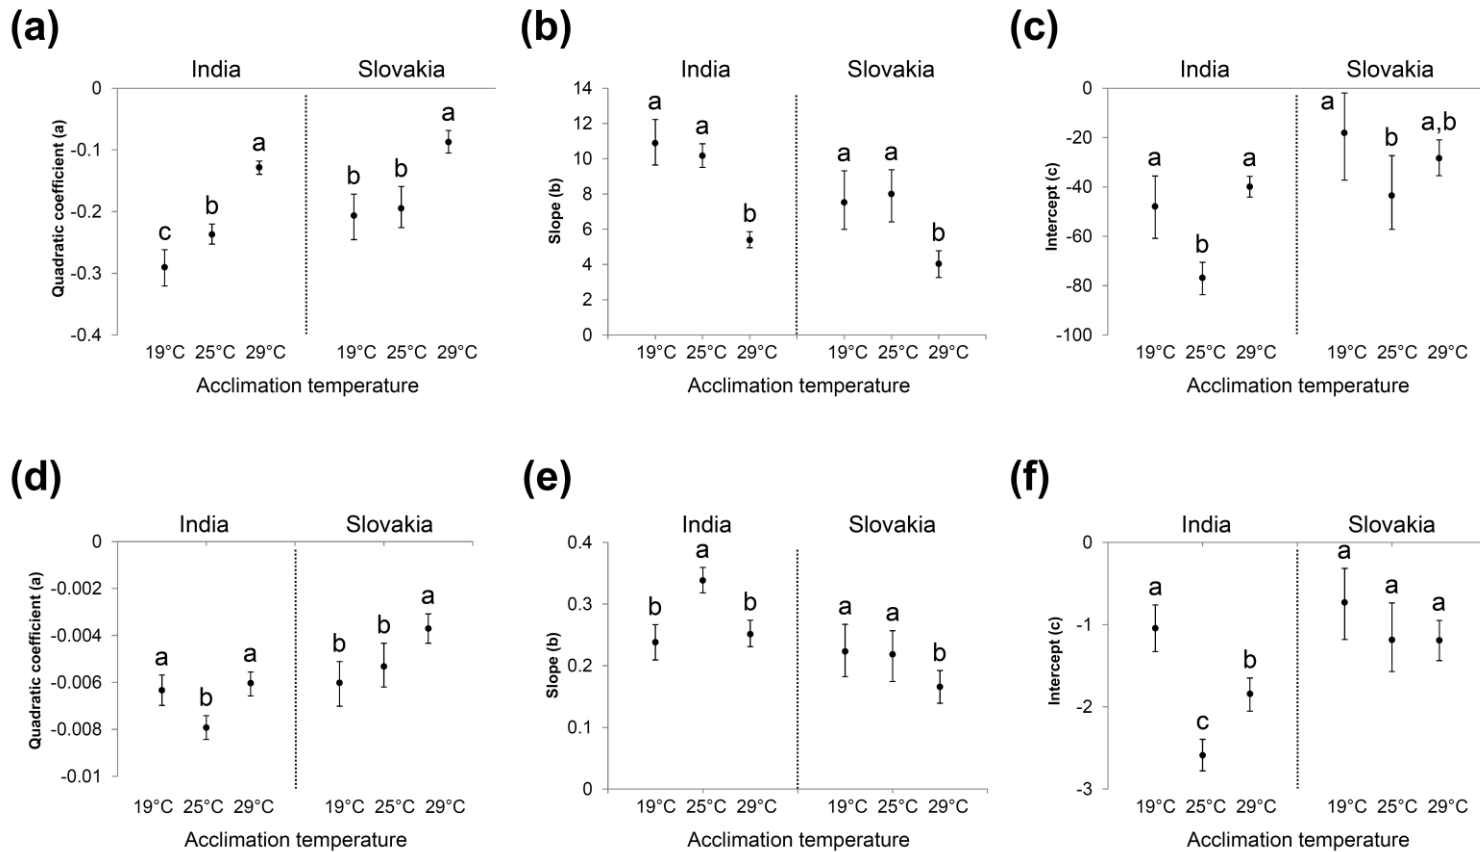

**Supplementary Figure S7.**

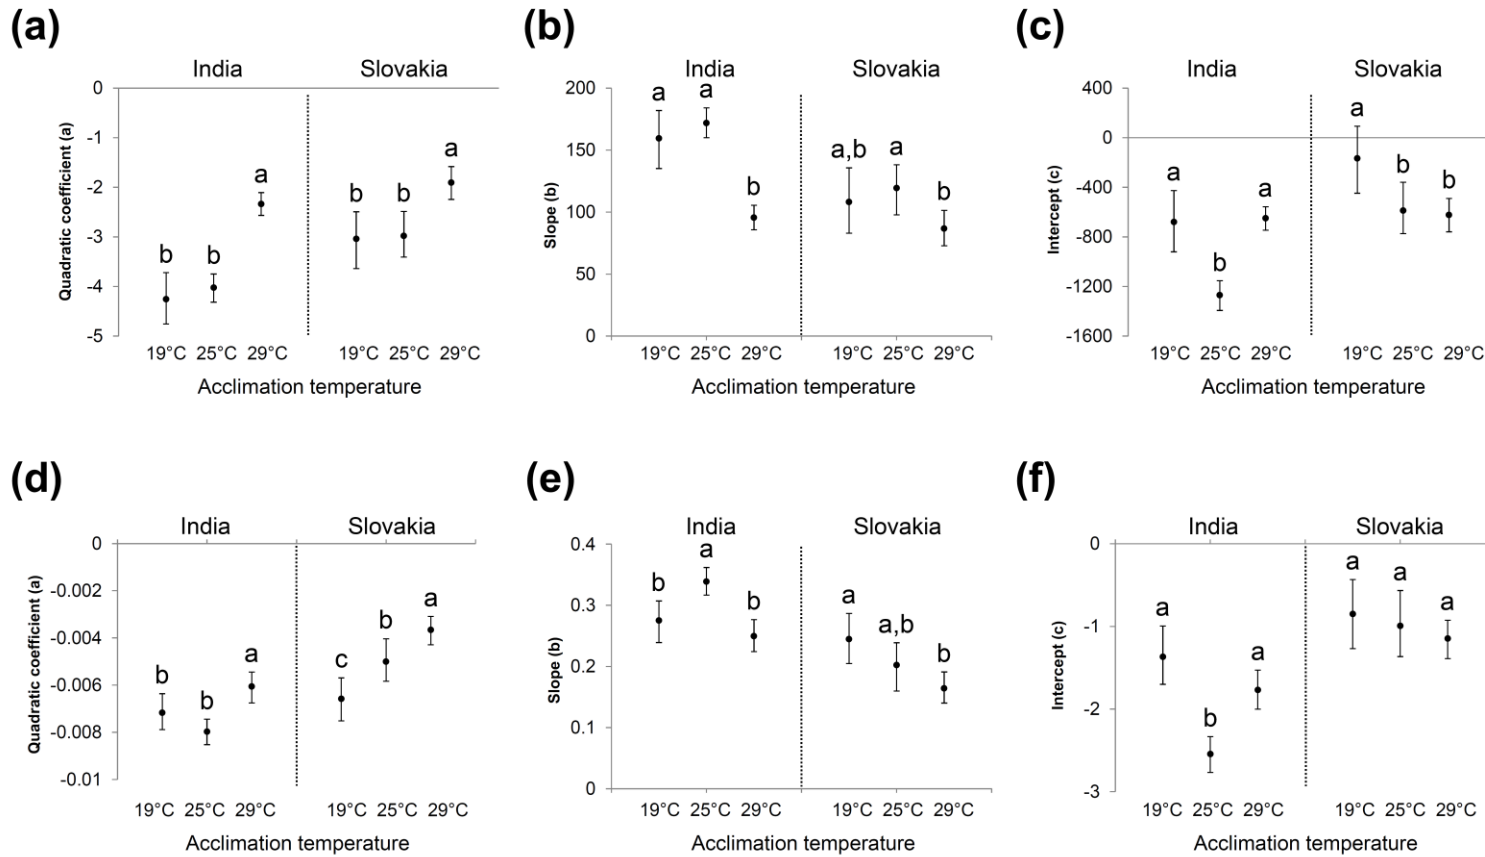

Supplementary Figure S8.

(a)

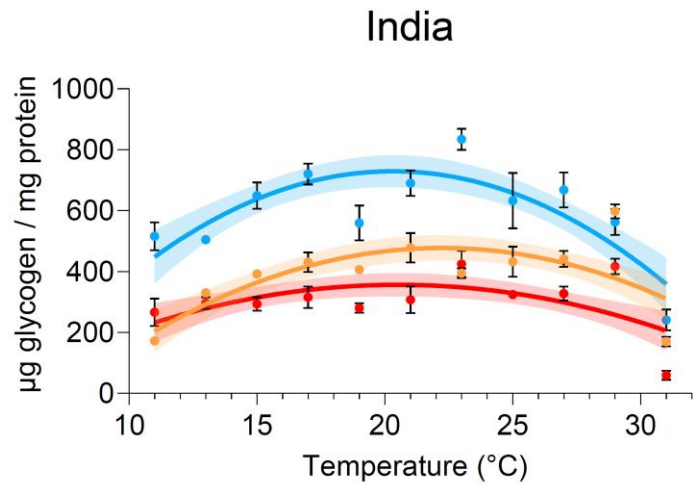

(b)

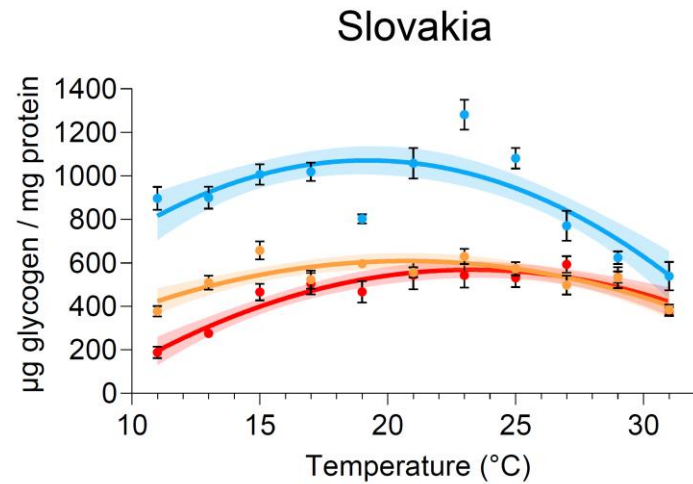

Acclimation temperature

● 19°C ● 25°C ● 29°C

Supplementary Figure S9.

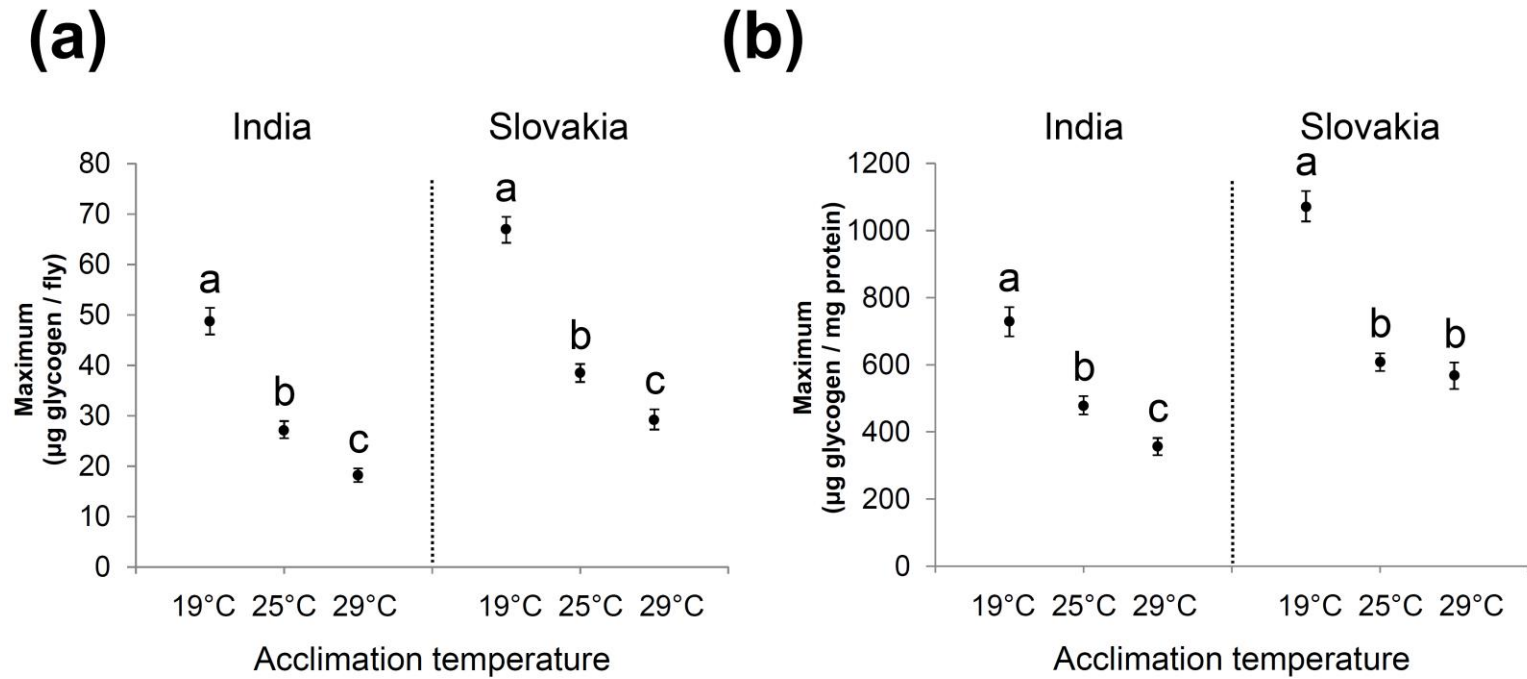

Supplementary Figure S10.

(a)

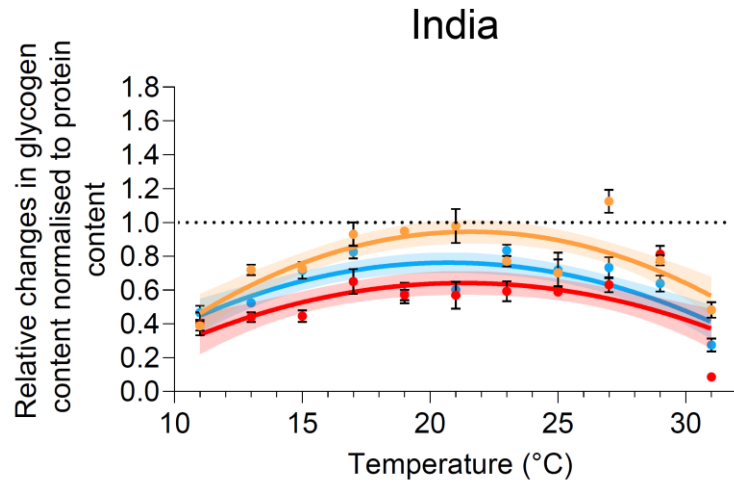

(b)

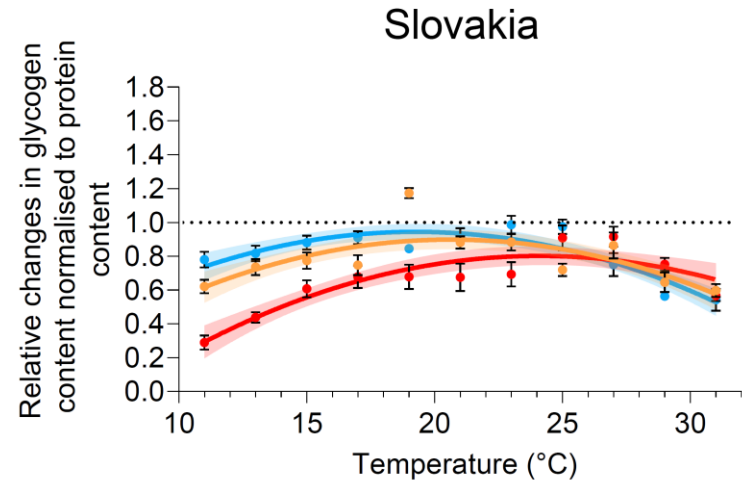

Acclimation temperature

● 19°C ● 25°C ● 29°C

Supplementary Figure S11.

**(a)**

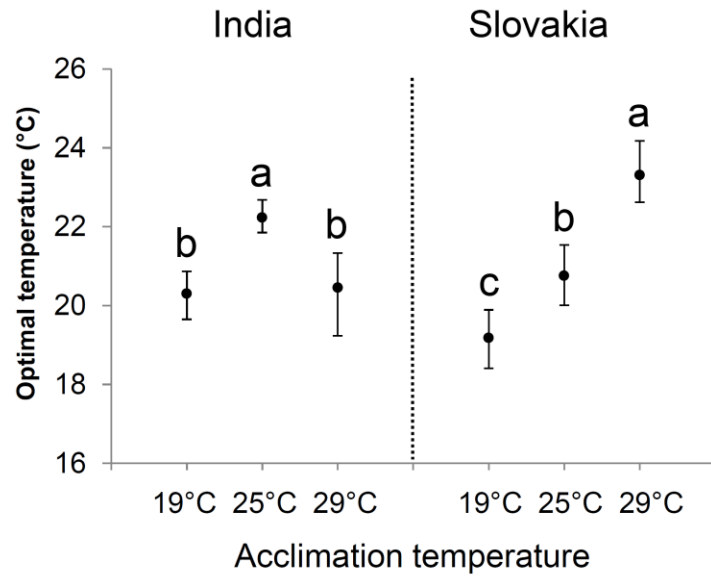

**(b)**

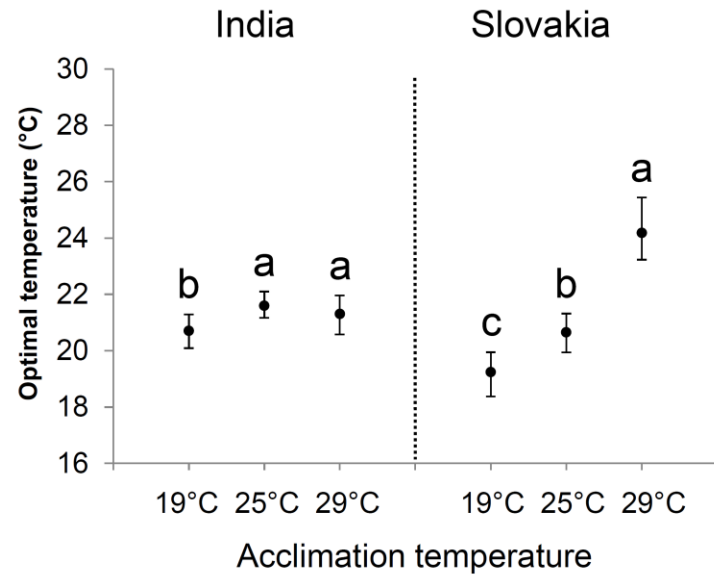



Supplementary Figure S12.

**(a)**

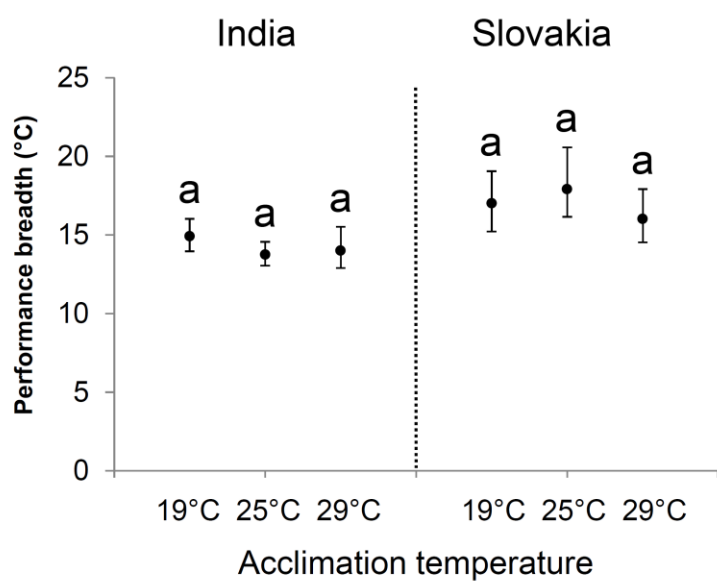

**(b)**

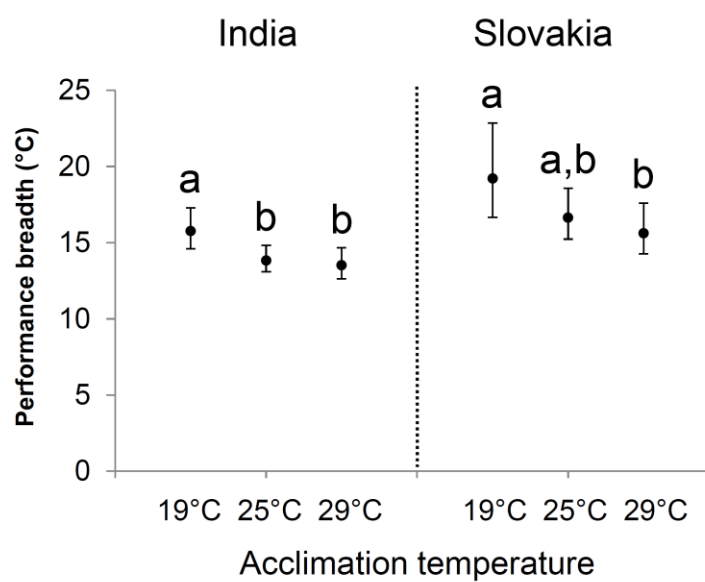

**(c)**

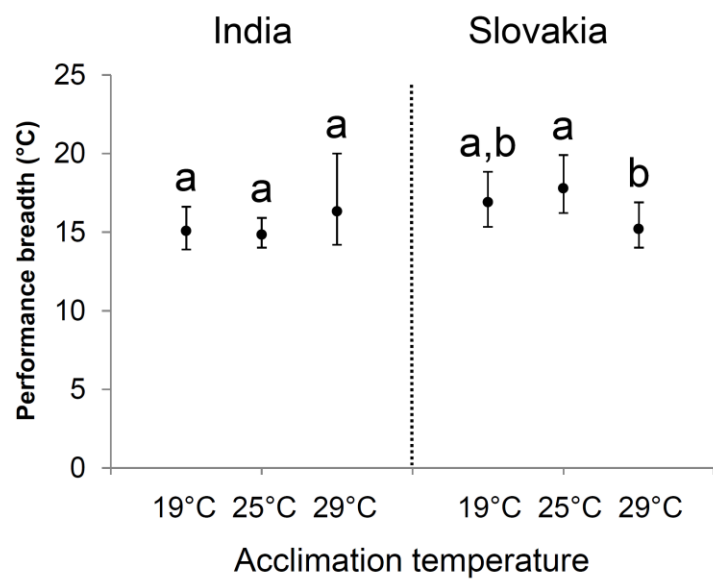

**(d)**

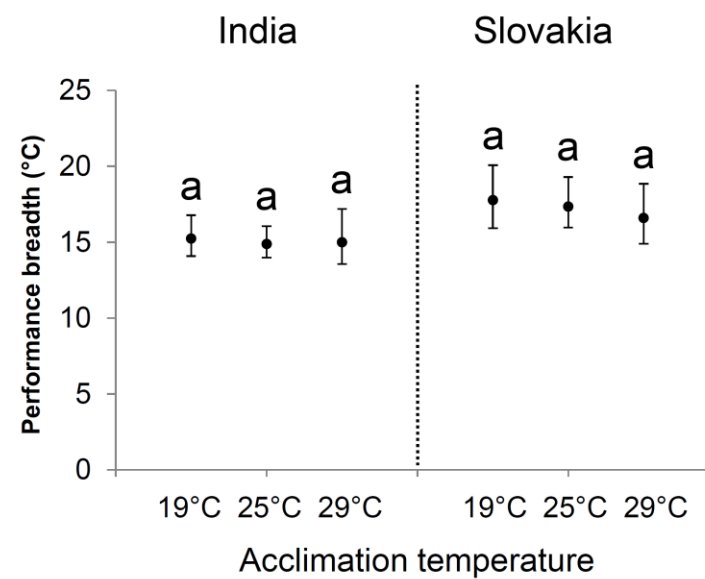

**Supplementary Figure S13.**

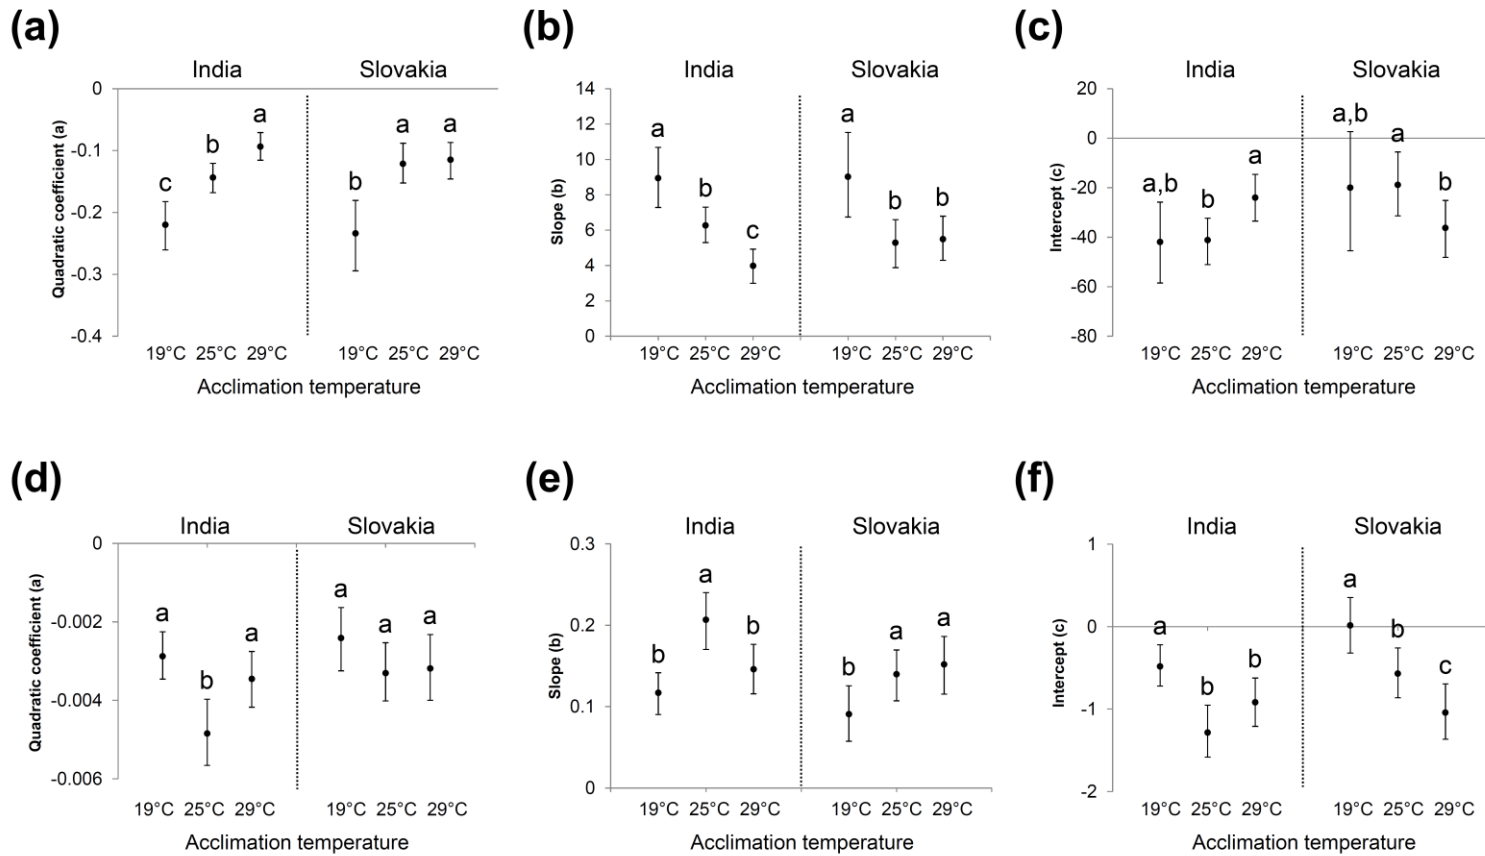

**Supplementary Figure S14.**

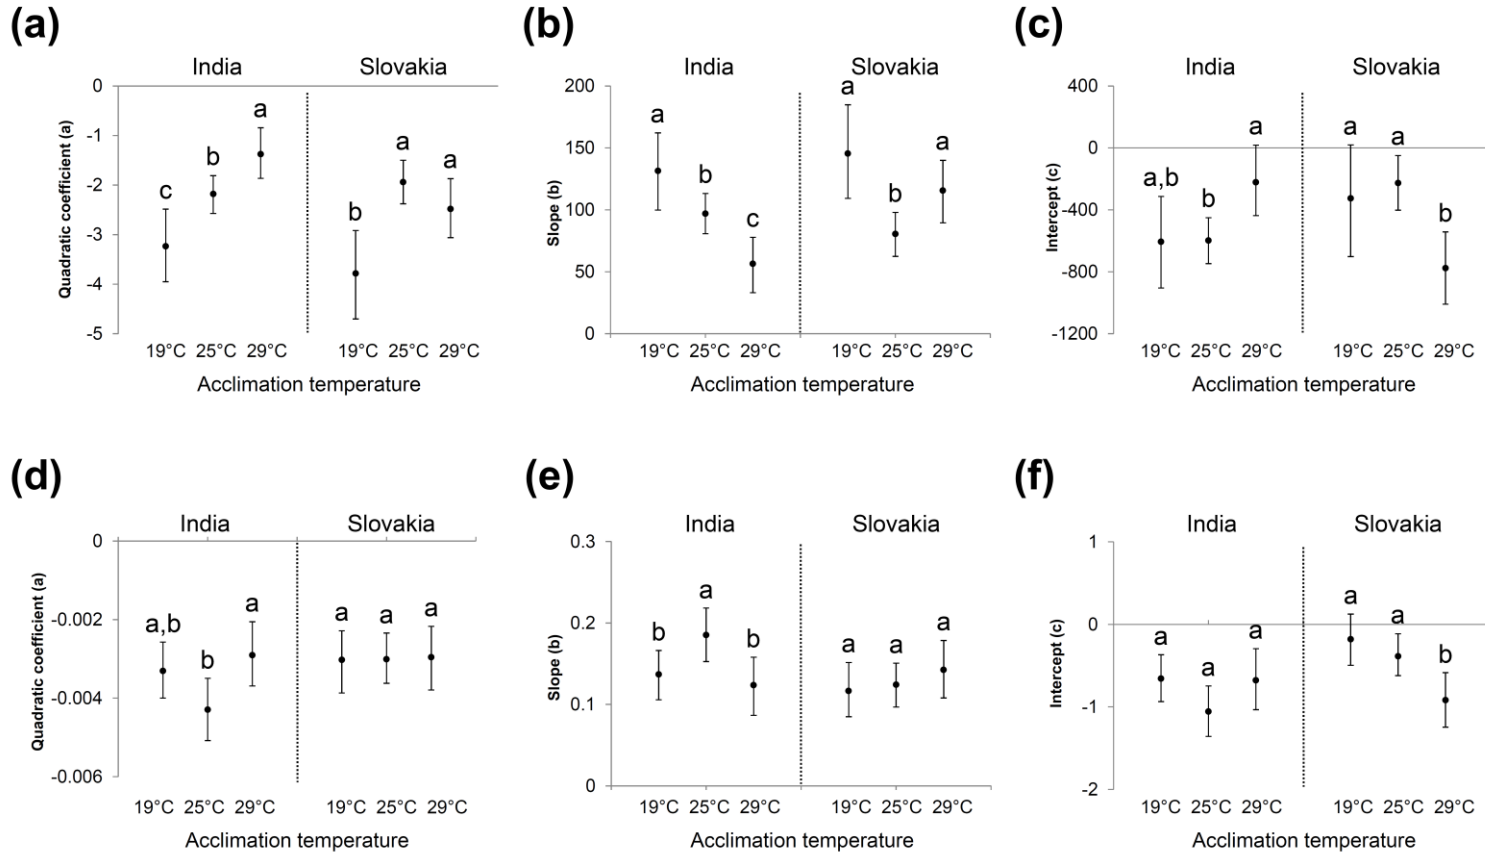

**Supplementary Table S1.** Multiple nonlinear (quadratic) regression analyses of the fat content ( $\mu\text{g}$  glycerides per fly). *df* - degrees of freedom; SSQ - the sum of squares for each source of variation.

| <b>Source of variation</b>                                                           | <b><i>df</i></b> | <b>SSQ</b> | <b><i>F</i>-ratio</b> | <b><i>P</i>-value</b> |
|--------------------------------------------------------------------------------------|------------------|------------|-----------------------|-----------------------|
| Population                                                                           | 1                | 1193.76    | 48.20                 | < 0.0001              |
| Acclimation temperature                                                              | 2                | 50768.03   | 1024.97               | < 0.0001              |
| Test temperature                                                                     | 1                | 15856.33   | 640.25                | < 0.0001              |
| (Test temperature) <sup>2</sup>                                                      | 1                | 17642.09   | 712.36                | < 0.0001              |
| Population $\times$ Acclimation temperature                                          | 2                | 1192.91    | 24.08                 | < 0.0001              |
| Population $\times$ Test temperature                                                 | 1                | 356.17     | 14.38                 | < 0.0001              |
| Population $\times$ (Test temperature) <sup>2</sup>                                  | 1                | 377.66     | 15.25                 | < 0.0001              |
| Acclimation temperature $\times$ Test temperature                                    | 2                | 1162.66    | 23.47                 | < 0.0001              |
| Acclimation temperature $\times$ (Test temperature) <sup>2</sup>                     | 2                | 1732.54    | 34.98                 | < 0.0001              |
| Population $\times$ Acclimation temperature $\times$ Test temperature                | 2                | 48.77      | 0.98                  | 0.37                  |
| Population $\times$ Acclimation temperature $\times$ (Test temperature) <sup>2</sup> | 2                | 49.99      | 1.01                  | 0.37                  |
| Error                                                                                | 376              | 9311.91    | -                     | -                     |

**Supplementary Table S2.** Multiple nonlinear (quadratic) regression analyses of the relative changes in the fat content (the end values divided by the mean of initial values). *df* - degrees of freedom; SSQ - the sum of squares for each source of variation.

| <b>Source of variation</b>                                             | <b><i>df</i></b> | <b>SSQ</b> | <b><i>F</i>-ratio</b> | <b><i>P</i>-value</b> |
|------------------------------------------------------------------------|------------------|------------|-----------------------|-----------------------|
| Population                                                             | 1                | 0.79       | 35.22                 | < 0.0001              |
| Acclimation temperature                                                | 2                | 14.20      | 315.61                | < 0.0001              |
| Test temperature                                                       | 1                | 15.46      | 687.32                | < 0.0001              |
| (Test temperature) <sup>2</sup>                                        | 1                | 16.88      | 750.19                | < 0.0001              |
| Population × Acclimation temperature                                   | 2                | 0.63       | 14.06                 | < 0.0001              |
| Population × Test temperature                                          | 1                | 0.36       | 16.21                 | < 0.0001              |
| Population × (Test temperature) <sup>2</sup>                           | 1                | 0.37       | 16.59                 | < 0.0001              |
| Acclimation temperature × Test temperature                             | 2                | 0.23       | 5.17                  | 0.006                 |
| Acclimation temperature × (Test temperature) <sup>2</sup>              | 2                | 0.27       | 5.99                  | 0.003                 |
| Population × Acclimation temperature × Test temperature                | 2                | 0.13       | 2.88                  | 0.058                 |
| Population × Acclimation temperature × (Test temperature) <sup>2</sup> | 2                | 0.13       | 2.84                  | 0.060                 |
| Error                                                                  | 376              | 8.46       | -                     | -                     |

**Supplementary Table S3.** Multiple nonlinear (quadratic) regression analyses of the fat content normalised to protein content ( $\mu\text{g}$  glycerides per mg protein). *df* - degrees of freedom; SSQ - the sum of squares for each source of variation.

| <b>Source of variation</b>                                                           | <b><i>df</i></b> | <b>SSQ</b> | <b><i>F</i>-ratio</b> | <b><i>P</i>-value</b> |
|--------------------------------------------------------------------------------------|------------------|------------|-----------------------|-----------------------|
| Population                                                                           | 1                | 258168.3   | 35.69                 | < 0.0001              |
| Acclimation temperature                                                              | 2                | 9116968.5  | 630.22                | < 0.0001              |
| Test temperature                                                                     | 1                | 4122303.6  | 569.92                | < 0.0001              |
| (Test temperature) <sup>2</sup>                                                      | 1                | 4652130.8  | 643.17                | < 0.0001              |
| Population $\times$ Acclimation temperature                                          | 2                | 63466.4    | 4.39                  | 0.013                 |
| Population $\times$ Test temperature                                                 | 1                | 94018.8    | 13.00                 | 0.0004                |
| Population $\times$ (Test temperature) <sup>2</sup>                                  | 1                | 97047.6    | 13.42                 | 0.0003                |
| Acclimation temperature $\times$ Test temperature                                    | 2                | 149044.1   | 10.30                 | < 0.0001              |
| Acclimation temperature $\times$ (Test temperature) <sup>2</sup>                     | 2                | 231130.9   | 15.98                 | < 0.0001              |
| Population $\times$ Acclimation temperature $\times$ Test temperature                | 2                | 27342.9    | 1.89                  | 0.15                  |
| Population $\times$ Acclimation temperature $\times$ (Test temperature) <sup>2</sup> | 2                | 13324.2    | 0.92                  | 0.40                  |
| Error                                                                                | 376              | 2719672.7  | -                     | -                     |

**Supplementary Table S4.** Multiple nonlinear (quadratic) regression analyses of the relative changes in the fat content normalised to protein content (the end values divided by the mean of initial values). *df* - degrees of freedom; SSQ - the sum of squares for each source of variation.

| <b>Source of variation</b>                                             | <b><i>df</i></b> | <b>SSQ</b> | <b><i>F</i>-ratio</b> | <b><i>P</i>-value</b> |
|------------------------------------------------------------------------|------------------|------------|-----------------------|-----------------------|
| Population                                                             | 1                | 0.71       | 28.63                 | < 0.0001              |
| Acclimation temperature                                                | 2                | 15.86      | 318.33                | < 0.0001              |
| Test temperature                                                       | 1                | 16.33      | 655.83                | < 0.0001              |
| (Test temperature) <sup>2</sup>                                        | 1                | 17.96      | 720.92                | < 0.0001              |
| Population × Acclimation temperature                                   | 2                | 0.56       | 11.20                 | < 0.0001              |
| Population × Test temperature                                          | 1                | 0.47       | 18.92                 | < 0.0001              |
| Population × (Test temperature) <sup>2</sup>                           | 1                | 0.47       | 18.98                 | < 0.0001              |
| Acclimation temperature × Test temperature                             | 2                | 0.21       | 4.22                  | 0.015                 |
| Acclimation temperature × (Test temperature) <sup>2</sup>              | 2                | 0.37       | 7.45                  | 0.0007                |
| Population × Acclimation temperature × Test temperature                | 2                | 0.13       | 2.65                  | 0.072                 |
| Population × Acclimation temperature × (Test temperature) <sup>2</sup> | 2                | 0.13       | 2.62                  | 0.07                  |
| Error                                                                  | 376              | 9.36       | -                     | -                     |

**Supplementary Table S5.** Multiple nonlinear (quadratic) regression analyses of the fat content ( $\mu\text{g}$  glycerides per fly), the relative changes in the fat content, the fat content normalised to protein content ( $\mu\text{g}$  glycerides per mg protein), and the relative changes in the fat content normalised to protein content. *df* - degrees of freedom; SSQ - the sum of squares for each source of variation.

| Population | Trait                                                             | Source of variation                                              | <i>df</i> | SSQ       | <i>F</i> -ratio | <i>P</i> -value |
|------------|-------------------------------------------------------------------|------------------------------------------------------------------|-----------|-----------|-----------------|-----------------|
| India      | Fat content                                                       | Acclimation temperature                                          | 2         | 29661.15  | 762.75          | < 0.0001        |
|            |                                                                   | Test temperature                                                 | 1         | 10692.52  | 549.93          | < 0.0001        |
|            |                                                                   | (Test temperature) <sup>2</sup>                                  | 1         | 11778.06  | 605.76          | < 0.0001        |
|            |                                                                   | Acclimation temperature $\times$ Test temperature                | 2         | 822.77    | 21.16           | < 0.0001        |
|            |                                                                   | Acclimation temperature $\times$ (Test temperature) <sup>2</sup> | 2         | 1123.08   | 28.88           | < 0.0001        |
|            |                                                                   | Error                                                            | 189       | 3674.81   | -               | -               |
|            | Relative changes in fat content                                   | Acclimation temperature                                          | 2         | 4.74      | 117.17          | < 0.0001        |
|            |                                                                   | Test temperature                                                 | 1         | 10.49     | 519.30          | < 0.0001        |
|            |                                                                   | (Test temperature) <sup>2</sup>                                  | 1         | 11.31     | 559.90          | < 0.0001        |
|            |                                                                   | Acclimation temperature $\times$ Test temperature                | 2         | 0.27      | 6.78            | 0.001           |
|            |                                                                   | Acclimation temperature $\times$ (Test temperature) <sup>2</sup> | 2         | 0.17      | 4.26            | 0.016           |
|            |                                                                   | Error                                                            | 189       | 3.82      | -               | -               |
|            | Fat content normalised to protein content                         | Acclimation temperature                                          | 2         | 4979814.1 | 414.92          | < 0.0001        |
|            |                                                                   | Test temperature                                                 | 1         | 2785374.0 | 464.15          | < 0.0001        |
|            |                                                                   | (Test temperature) <sup>2</sup>                                  | 1         | 3095647.9 | 515.86          | < 0.0001        |
|            |                                                                   | Acclimation temperature $\times$ Test temperature                | 2         | 154567.4  | 12.88           | < 0.0001        |
|            |                                                                   | Acclimation temperature $\times$ (Test temperature) <sup>2</sup> | 2         | 181277.9  | 15.10           | < 0.0001        |
|            |                                                                   | Error                                                            | 189       | 1134186.6 | -               | -               |
|            | Relative changes in the fat content normalised to protein content | Acclimation temperature                                          | 2         | 5.40      | 118.92          | < 0.0001        |
|            |                                                                   | Test temperature                                                 | 1         | 11.40     | 502.02          | < 0.0001        |
|            |                                                                   | (Test temperature) <sup>2</sup>                                  | 1         | 12.32     | 542.64          | < 0.0001        |
|            |                                                                   | Acclimation temperature $\times$ Test temperature                | 2         | 0.20      | 4.30            | 0.015           |
|            |                                                                   | Acclimation temperature $\times$ (Test temperature) <sup>2</sup> | 2         | 0.15      | 3.37            | 0.037           |
|            |                                                                   | Error                                                            | 189       | 4.29      | -               | -               |
| Slovakia   | Fat content                                                       | Acclimation temperature                                          | 2         | 22354.45  | 370.78          | < 0.0001        |
|            |                                                                   | Test temperature                                                 | 1         | 5619.53   | 186.42          | < 0.0001        |
|            |                                                                   | (Test temperature) <sup>2</sup>                                  | 1         | 6328.20   | 209.93          | < 0.0001        |
|            |                                                                   | Acclimation temperature $\times$ Test temperature                | 2         | 401.35    | 6.66            | 0.0016          |
|            |                                                                   | Acclimation temperature $\times$ (Test temperature) <sup>2</sup> | 2         | 671.40    | 11.14           | < 0.0001        |
|            |                                                                   | Error                                                            | 187       | 5637.10   | -               | -               |
|            | Relative changes in fat content                                   | Acclimation temperature                                          | 2         | 10.05     | 202.49          | < 0.0001        |
|            |                                                                   | Test temperature                                                 | 1         | 5.43      | 218.97          | < 0.0001        |
|            |                                                                   | (Test temperature) <sup>2</sup>                                  | 1         | 6.02      | 242.64          | < 0.0001        |
|            |                                                                   | Acclimation temperature $\times$ Test temperature                | 2         | 0.09      | 1.79            | 0.17            |
|            |                                                                   | Acclimation temperature $\times$ (Test temperature) <sup>2</sup> | 2         | 0.22      | 4.47            | 0.013           |
|            |                                                                   | Error                                                            | 187       | 4.64      | -               | -               |
|            | Fat content normalised to protein content                         | Acclimation temperature                                          | 2         | 4195347.7 | 247.41          | < 0.0001        |
|            |                                                                   | Test temperature                                                 | 1         | 1457015.2 | 171.85          | < 0.0001        |
|            |                                                                   | (Test temperature) <sup>2</sup>                                  | 1         | 1676063.7 | 197.68          | < 0.0001        |
|            |                                                                   | Acclimation temperature $\times$ Test temperature                | 2         | 24700.4   | 1.46            | 0.24            |
|            |                                                                   | Acclimation temperature $\times$ (Test temperature) <sup>2</sup> | 2         | 65656.8   | 3.87            | 0.023           |
|            |                                                                   | Error                                                            | 187       | 1585486.1 | -               | -               |
|            | Relative changes in the fat content normalised to protein content | Acclimation temperature                                          | 2         | 10.95     | 201.84          | < 0.0001        |
|            |                                                                   | Test temperature                                                 | 1         | 5.52      | 203.50          | < 0.0001        |
|            |                                                                   | (Test temperature) <sup>2</sup>                                  | 1         | 6.20      | 228.64          | < 0.0001        |
|            |                                                                   | Acclimation temperature $\times$ Test temperature                | 2         | 0.15      | 2.68            | 0.07            |
|            |                                                                   | Acclimation temperature $\times$ (Test temperature) <sup>2</sup> | 2         | 0.34      | 6.32            | 0.0065          |
|            |                                                                   | Error                                                            | 187       | 5.07      | -               | -               |



**Supplementary Table S6.** Multiple nonlinear (quadratic) regression analyses of the glycogen content ( $\mu\text{g}$  glycogen per fly). *df* - degrees of freedom; SSQ - the sum of squares for each source of variation.

| <b>Source of variation</b>                                             | <b><i>df</i></b> | <b>SSQ</b> | <b><i>F</i>-ratio</b> | <b><i>P</i>-value</b> |
|------------------------------------------------------------------------|------------------|------------|-----------------------|-----------------------|
| Population                                                             | 1                | 16120.92   | 338.72                | < 0.0001              |
| Acclimation temperature                                                | 2                | 59815.16   | 628.40                | < 0.0001              |
| Test temperature                                                       | 1                | 11503.28   | 241.70                | < 0.0001              |
| (Test temperature) <sup>2</sup>                                        | 1                | 11693.51   | 245.70                | < 0.0001              |
| Population × Acclimation temperature                                   | 2                | 1055.44    | 11.09                 | < 0.0001              |
| Population × Test temperature                                          | 1                | 3.02       | 0.06                  | 0.80                  |
| Population × (Test temperature) <sup>2</sup>                           | 1                | 2.46       | 0.05                  | 0.82                  |
| Acclimation temperature × Test temperature                             | 2                | 886.20     | 9.31                  | 0.0001                |
| Acclimation temperature × (Test temperature) <sup>2</sup>              | 2                | 1343.70    | 14.12                 | < 0.0001              |
| Population × Acclimation temperature × Test temperature                | 2                | 64.23      | 0.67                  | 0.51                  |
| Population × Acclimation temperature × (Test temperature) <sup>2</sup> | 2                | 39.67      | 0.42                  | 0.66                  |
| Error                                                                  | 373              | 17752.40   | -                     | -                     |

**Supplementary Table S7.** Multiple nonlinear (quadratic) regression analyses of the relative changes in the glycogen content (the end values divided by the mean of initial values). *df* - degrees of freedom; SSQ - the sum of squares for each source of variation.

| <b>Source of variation</b>                                             | <b><i>df</i></b> | <b>SSQ</b> | <b><i>F</i>-ratio</b> | <b><i>P</i>-value</b> |
|------------------------------------------------------------------------|------------------|------------|-----------------------|-----------------------|
| Population                                                             | 1                | 1.31       | 56.54                 | < 0.0001              |
| Acclimation temperature                                                | 2                | 2.61       | 56.61                 | < 0.0001              |
| Test temperature                                                       | 1                | 5.48       | 237.51                | < 0.0001              |
| (Test temperature) <sup>2</sup>                                        | 1                | 5.46       | 236.50                | < 0.0001              |
| Population × Acclimation temperature                                   | 2                | 0.24       | 5.19                  | 0.006                 |
| Population × Test temperature                                          | 1                | 0.06       | 2.44                  | 0.12                  |
| Population × (Test temperature) <sup>2</sup>                           | 1                | 0.07       | 2.96                  | 0.09                  |
| Acclimation temperature × Test temperature                             | 2                | 0.22       | 4.87                  | 0.008                 |
| Acclimation temperature × (Test temperature) <sup>2</sup>              | 2                | 0.17       | 3.59                  | 0.028                 |
| Population × Acclimation temperature × Test temperature                | 2                | 0.06       | 1.30                  | 0.27                  |
| Population × Acclimation temperature × (Test temperature) <sup>2</sup> | 2                | 0.04       | 0.83                  | 0.44                  |
| Error                                                                  | 373              | 8.61       | -                     | -                     |

**Supplementary Table S8.** Multiple nonlinear (quadratic) regression analyses of the glycogen content normalised to protein content ( $\mu\text{g}$  glycogen per mg protein). *df* - degrees of freedom; SSQ - the sum of squares for each source of variation.

| <b>Source of variation</b>                                             | <b><i>df</i></b> | <b>SSQ</b> | <b><i>F</i>-ratio</b> | <b><i>P</i>-value</b> |
|------------------------------------------------------------------------|------------------|------------|-----------------------|-----------------------|
| Population                                                             | 1                | 4000753    | 251.11                | < 0.0001              |
| Acclimation temperature                                                | 2                | 10152136   | 318.60                | < 0.0001              |
| Test temperature                                                       | 1                | 2969256    | 186.36                | < 0.0001              |
| (Test temperature) <sup>2</sup>                                        | 1                | 3055424    | 191.77                | < 0.0001              |
| Population × Acclimation temperature                                   | 2                | 558162     | 17.52                 | < 0.0001              |
| Population × Test temperature                                          | 1                | 24658      | 1.55                  | 0.21                  |
| Population × (Test temperature) <sup>2</sup>                           | 1                | 27676      | 1.74                  | 0.19                  |
| Acclimation temperature × Test temperature                             | 2                | 162495     | 5.10                  | 0.0065                |
| Acclimation temperature × (Test temperature) <sup>2</sup>              | 2                | 257162     | 8.07                  | 0.0004                |
| Population × Acclimation temperature × Test temperature                | 2                | 63612      | 2.00                  | 0.14                  |
| Population × Acclimation temperature × (Test temperature) <sup>2</sup> | 2                | 35591      | 1.12                  | 0.33                  |
| Error                                                                  | 373              | 5942829    | -                     | -                     |

**Supplementary Table S9.** Multiple nonlinear (quadratic) regression analyses of the relative changes in the glycogen content normalised to protein content (the end values divided by the mean of initial values). *df* - degrees of freedom; SSQ - the sum of squares for each source of variation.

| <b>Source of variation</b>                                             | <b><i>df</i></b> | <b>SSQ</b> | <b><i>F</i>-ratio</b> | <b><i>P</i>-value</b> |
|------------------------------------------------------------------------|------------------|------------|-----------------------|-----------------------|
| Population                                                             | 1                | 1.11       | 42.61                 | < 0.0001              |
| Acclimation temperature                                                | 2                | 2.32       | 44.38                 | < 0.0001              |
| Test temperature                                                       | 1                | 5.20       | 198.78                | < 0.0001              |
| (Test temperature) <sup>2</sup>                                        | 1                | 5.15       | 196.91                | < 0.0001              |
| Population × Acclimation temperature                                   | 2                | 0.54       | 10.32                 | < 0.0001              |
| Population × Test temperature                                          | 1                | 0.03       | 1.11                  | 0.29                  |
| Population × (Test temperature) <sup>2</sup>                           | 1                | 0.03       | 1.16                  | 0.28                  |
| Acclimation temperature × Test temperature                             | 2                | 0.04       | 0.76                  | 0.47                  |
| Acclimation temperature × (Test temperature) <sup>2</sup>              | 2                | 0.04       | 0.86                  | 0.42                  |
| Population × Acclimation temperature × Test temperature                | 2                | 0.07       | 1.42                  | 0.24                  |
| Population × Acclimation temperature × (Test temperature) <sup>2</sup> | 2                | 0.04       | 0.76                  | 0.47                  |
| Error                                                                  | 373              | 9.75       | -                     | -                     |

**Supplementary Table S10.** Multiple nonlinear (quadratic) regression analyses of the glycogen content ( $\mu\text{g}$  glycogen per fly), the relative changes in the glycogen content, the glycogen content normalised to protein content ( $\mu\text{g}$  glycogen per mg protein), and the relative changes in the glycogen content normalised to protein content. *df* - degrees of freedom; SSQ - the sum of squares for each source of variation.

| Population | Trait                                                                  | Source of variation                                              | <i>df</i> | SSQ       | <i>F</i> -ratio | <i>P</i> -value |
|------------|------------------------------------------------------------------------|------------------------------------------------------------------|-----------|-----------|-----------------|-----------------|
| India      | Glycogen content                                                       | Acclimation temperature                                          | 2         | 22558.61  | 268.99          | < 0.0001        |
|            |                                                                        | Test temperature                                                 | 1         | 5565.93   | 132.74          | < 0.0001        |
|            |                                                                        | (Test temperature) <sup>2</sup>                                  | 1         | 5677.98   | 135.41          | < 0.0001        |
|            |                                                                        | Acclimation temperature $\times$ Test temperature                | 2         | 551.68    | 6.58            | 0.0017          |
|            |                                                                        | Acclimation temperature $\times$ (Test temperature) <sup>2</sup> | 2         | 654.13    | 7.80            | 0.0006          |
|            |                                                                        | Error                                                            | 186       | 7799.22   | -               | -               |
|            | Relative changes in glycogen content                                   | Acclimation temperature                                          | 2         | 1.81      | 33.66           | < 0.0001        |
|            |                                                                        | Test temperature                                                 | 1         | 3.33      | 123.86          | < 0.0001        |
|            |                                                                        | (Test temperature) <sup>2</sup>                                  | 1         | 3.38      | 125.71          | < 0.0001        |
|            |                                                                        | Acclimation temperature $\times$ Test temperature                | 2         | 0.19      | 3.54            | 0.031           |
|            |                                                                        | Acclimation temperature $\times$ (Test temperature) <sup>2</sup> | 2         | 0.17      | 3.09            | 0.047           |
|            |                                                                        | Error                                                            | 186       | 4.99      | -               | -               |
|            | Glycogen content normalised to protein content                         | Acclimation temperature                                          | 2         | 3058418.7 | 106.94          | < 0.0001        |
|            |                                                                        | Test temperature                                                 | 1         | 1226156.5 | 85.75           | < 0.0001        |
|            |                                                                        | (Test temperature) <sup>2</sup>                                  | 1         | 1250693.4 | 87.47           | < 0.0001        |
|            |                                                                        | Acclimation temperature $\times$ Test temperature                | 2         | 130610.1  | 4.57            | 0.012           |
|            |                                                                        | Acclimation temperature $\times$ (Test temperature) <sup>2</sup> | 2         | 145123.7  | 5.07            | 0.007           |
|            |                                                                        | Error                                                            | 186       | 2659682.0 | -               | -               |
|            | Relative changes in the glycogen content normalised to protein content | Acclimation temperature                                          | 2         | 1.94      | 30.91           | < 0.0001        |
|            |                                                                        | Test temperature                                                 | 1         | 3.00      | 95.72           | < 0.0001        |
|            |                                                                        | (Test temperature) <sup>2</sup>                                  | 1         | 2.98      | 95.19           | < 0.0001        |
|            |                                                                        | Acclimation temperature $\times$ Test temperature                | 2         | 0.10      | 1.54            | 0.22            |
|            |                                                                        | Acclimation temperature $\times$ (Test temperature) <sup>2</sup> | 2         | 0.08      | 1.35            | 0.26            |
|            |                                                                        | Error                                                            | 186       | 5.83      | -               | -               |
| Slovakia   | Glycogen content                                                       | Acclimation temperature                                          | 2         | 38275.61  | 359.56          | < 0.0001        |
|            |                                                                        | Test temperature                                                 | 1         | 5940.43   | 111.61          | < 0.0001        |
|            |                                                                        | (Test temperature) <sup>2</sup>                                  | 1         | 6018.01   | 113.07          | < 0.0001        |
|            |                                                                        | Acclimation temperature $\times$ Test temperature                | 2         | 398.79    | 3.75            | 0.025           |
|            |                                                                        | Acclimation temperature $\times$ (Test temperature) <sup>2</sup> | 2         | 729.26    | 6.85            | 0.0013          |
|            |                                                                        | Error                                                            | 187       | 9953.17   | -               | -               |
|            | Relative changes in glycogen content                                   | Acclimation temperature                                          | 2         | 1.04      | 26.74           | < 0.0001        |
|            |                                                                        | Test temperature                                                 | 1         | 2.22      | 114.45          | < 0.0001        |
|            |                                                                        | (Test temperature) <sup>2</sup>                                  | 1         | 2.15      | 111.30          | < 0.0001        |
|            |                                                                        | Acclimation temperature $\times$ Test temperature                | 2         | 0.09      | 2.45            | 0.089           |
|            |                                                                        | Acclimation temperature $\times$ (Test temperature) <sup>2</sup> | 2         | 0.04      | 0.98            | 0.38            |
|            |                                                                        | Error                                                            | 187       | 3.62      | -               | -               |
|            | Glycogen content normalised to protein content                         | Acclimation temperature                                          | 2         | 7646660.7 | 217.77          | < 0.0001        |
|            |                                                                        | Test temperature                                                 | 1         | 1767854.0 | 100.69          | < 0.0001        |
|            |                                                                        | (Test temperature) <sup>2</sup>                                  | 1         | 1832435.8 | 104.37          | < 0.0001        |
|            |                                                                        | Acclimation temperature $\times$ Test temperature                | 2         | 95523.1   | 2.72            | 0.069           |
|            |                                                                        | Acclimation temperature $\times$ (Test temperature) <sup>2</sup> | 2         | 147636.8  | 4.20            | 0.016           |
|            |                                                                        | Error                                                            | 187       | 3283147.1 | -               | -               |
|            | Relative changes in the glycogen content normalised to protein content | Acclimation temperature                                          | 2         | 0.91      | 21.67           | < 0.0001        |
|            |                                                                        | Test temperature                                                 | 1         | 2.23      | 106.12          | < 0.0001        |
|            |                                                                        | (Test temperature) <sup>2</sup>                                  | 1         | 2.19      | 104.65          | < 0.0001        |
|            |                                                                        | Acclimation temperature $\times$ Test temperature                | 2         | 0.02      | 0.41            | 0.67            |
|            |                                                                        | Acclimation temperature $\times$ (Test temperature) <sup>2</sup> | 2         | 0.0002    | 0.004           | 0.99            |
|            |                                                                        | Error                                                            | 187       | 3.92      | -               | -               |

**Supplementary Table S11.** The Akaike information criterion (AICc) for different functions fitted to data on the temperature dependence of lipid droplet size and the relative cell area occupied by lipid droplets.

| Trait                                             | Population | Linear | Quadratic     | Cubic        |
|---------------------------------------------------|------------|--------|---------------|--------------|
| Lipid droplet size                                | India      | 38.07  | <b>34.76</b>  | 34.84        |
|                                                   | Slovakia   | 49.08  | 39.98         | <b>38.38</b> |
| Rrelative cell area<br>occupied by lipid droplets | India      | -38.44 | <b>-41.88</b> | -38.29       |
|                                                   | Slovakia   | -39.20 | <b>-48.69</b> | -42.84       |

**Supplementary Table S12.** Multiple nonlinear (quadratic) regression analyses of the changes in lipid droplet size and the relative cell area occupied by lipid droplets (lipid droplet area/cell area). See Materials and methods for further details. *df* - degrees of freedom; SSQ - the sum of squares for each source of variation.

| <b>Trait</b>                                  | <b>Source of variation</b>                   | <b><i>df</i></b> | <b>SSQ</b> | <b><i>F</i>-ratio</b> | <b><i>P</i>-value</b> |
|-----------------------------------------------|----------------------------------------------|------------------|------------|-----------------------|-----------------------|
| Lipid droplet size                            | Population                                   | 1                | 792.22     | 170.91                | < 0.0001              |
|                                               | Test temperature                             | 1                | 1279.85    | 276.11                | < 0.0001              |
|                                               | (Test temperature) <sup>2</sup>              | 1                | 1195.33    | 257.88                | < 0.0001              |
|                                               | Population × Test temperature                | 1                | 138.04     | 29.78                 | < 0.0001              |
|                                               | Population × (Test temperature) <sup>2</sup> | 1                | 118.85     | 25.64                 | < 0.0001              |
|                                               | Error                                        | 373              | 5988.73    | -                     | -                     |
| Relative cell area occupied by lipid droplets | Population                                   | 1                | 0.20       | 31.95                 | < 0.0001              |
|                                               | Test temperature                             | 1                | 0.53       | 86.64                 | < 0.0001              |
|                                               | (Test temperature) <sup>2</sup>              | 1                | 0.61       | 99.62                 | < 0.0001              |
|                                               | Population × Test temperature                | 1                | 0.004      | 0.65                  | 0.42                  |
|                                               | Population × (Test temperature) <sup>2</sup> | 1                | 0.002      | 0.39                  | 0.53                  |
|                                               | Error                                        | 1292             | 7.96       | -                     | -                     |

**Supplementary Table S13.** Pairwise (Pearson) correlations between the fat content ( $\mu\text{g}$  glycerides per fly) and the lipid droplet size, and the relative cell area occupied by lipid droplets.

|             |          | Lipid droplet size |                 | Relative cell area occupied by lipid droplets |                 |
|-------------|----------|--------------------|-----------------|-----------------------------------------------|-----------------|
|             |          | Pearson's r        | <i>P</i> -value | Pearson's r                                   | <i>P</i> -value |
| Fat content | India    | 0.8067             | 0.0027          | 0.6640                                        | 0.026           |
|             | Slovakia | 0.5425             | 0.085           | 0.8264                                        | 0.0017          |
|             | Combined | 0.6943             | 0.0003          | 0.7787                                        | < 0.0001        |
